# Supplementary material for: Self-organized nanocrystal rings formed by microemulsion for selective recognition of proteins and immunoassays
Source: Royal Society of Chemistry journal article supplement (doi:10.1039/c8ra09662g), 2019-01-01
Supplement: c8ra09662g1.pdf [file c8ra09662g1.pdf]

## Supplementary Information

### Self-organized Nanocrystal Rings Formed by Microemulsion for Selective Recognition of Proteins and Immunoassays

Jing Liang,<sup>a</sup> Lei Yu,<sup>b</sup> Ziyang Lin,<sup>a</sup> Keji Song,<sup>a</sup> Jiejing Zhang,<sup>a</sup> Jianfeng Zhang<sup>\*a</sup>

<sup>a</sup> College of life science, Jilin Agricultural University, Changchun 130118, China

<sup>b</sup> Jilin Radion and TV University, Changchun 130022, China

E-mail: zhangjianfeng06@tsinghua.org.cn

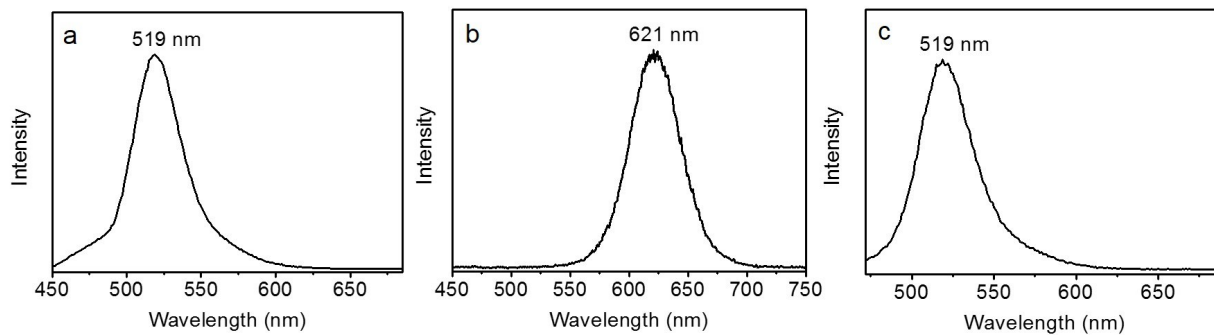

**Fig. S1** Emission spectra of QDs with (a) green and (b) red color fluorescence, (c) QDs-IgG with green fluorescence, respectively.

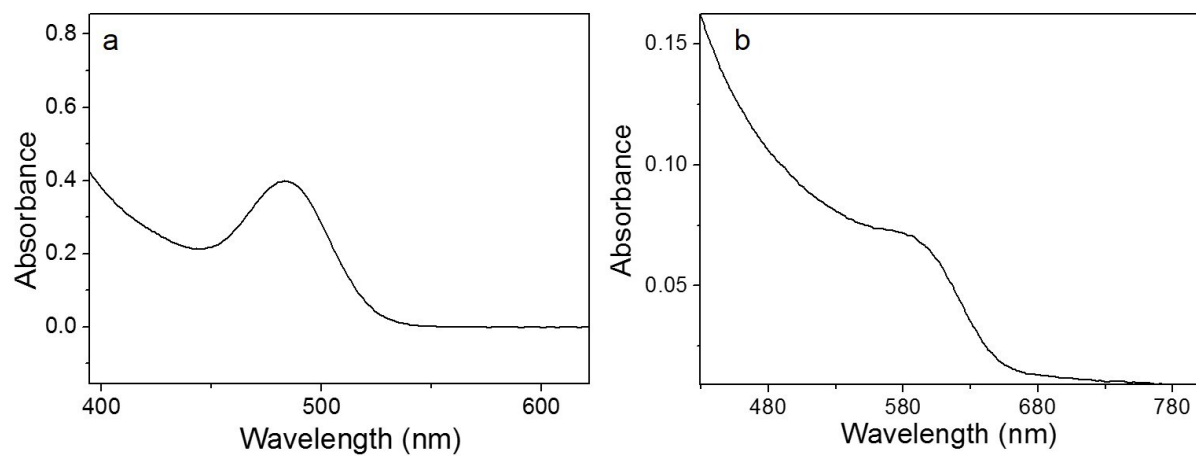

**Fig. S2** Absorption spectra of CdTe QDs with (a) green and (b) red color fluorescence, respectively.

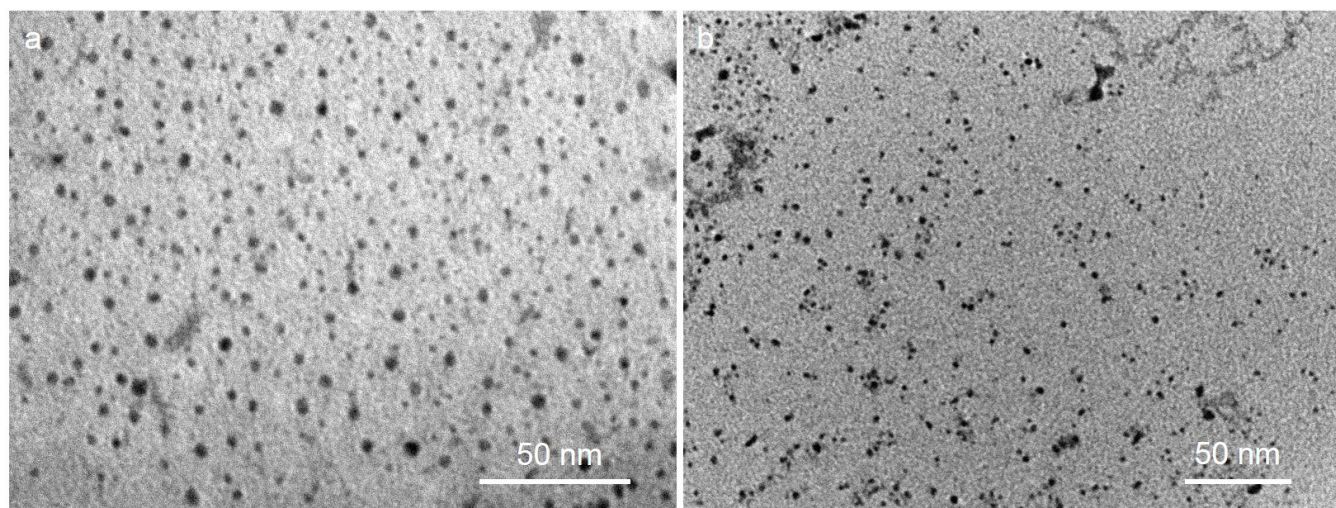

**Fig. S3** TEM images of CdTe QDs with (a) green and (b) red color fluorescence, respectively.
